# Supplementary material for: Effects of Rare Microbiome Taxa Filtering on Statistical Analysis
Source: PubMed Central journal article supplement (PMC7835481; doi:10.3389/fmicb.2020.607325), 2021-01-12
Supplement: Data_Sheet_1.pdf [file Data_Sheet_1.pdf]

## Supplementary Materials

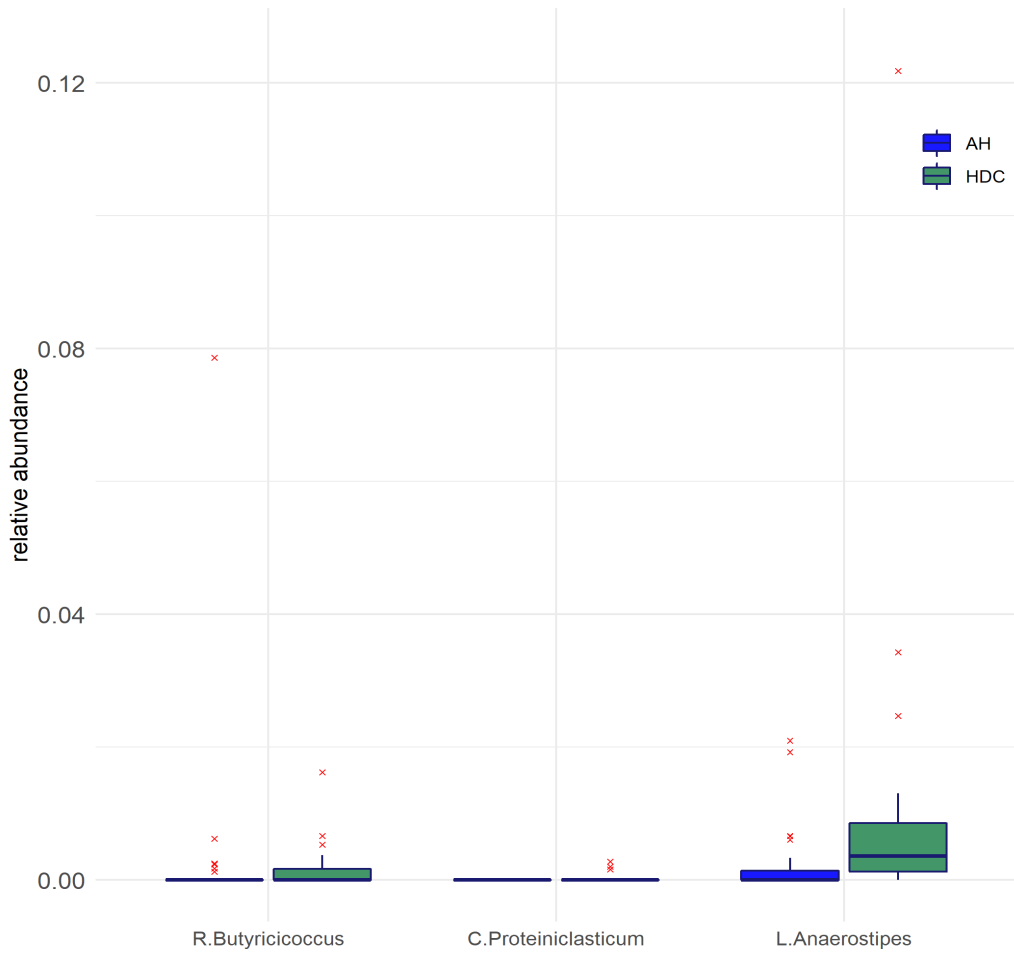

Figure 1: Alcoholic Hepatitis Data Analysis [1]. Taxa that are not present in the LEfSe and DESeq2 results from the filtered data when compared with the unfiltered data results. AH: Alcoholic Hepatitis group, HDC: Heavy Drinking Control group. Red crosses show relative abundance outliers.

| Features                                              | Mean          |       |       | Number of samples present |    | Abundance rank | Ranking            |                  |
|-------------------------------------------------------|---------------|-------|-------|---------------------------|----|----------------|--------------------|------------------|
|                                                       | Decrease Gini | HDC   | AH    | HDC                       | AH |                | RF Unfiltered rank | RF Filtered Rank |
| Veillonellaceae Veillonella                           | 1.015         | 0.001 | 0.038 | 6                         | 26 | 33             | 1                  | 1                |
| Ruminococcaceae unknown Anaerotruncus                 | 0.737         | 0.012 | 0.001 | 14                        | 5  | 36             | 2                  | 4                |
| Lachnospiraceae unknown Blautia                       | 0.706         | 0.011 | 0.002 | 14                        | 10 | 15             | 3                  | 9                |
| Lachnospiraceae unknown Lachnospiracea incertae sedis | 0.705         | 0.029 | 0.006 | 20                        | 23 | 2              | 4                  | 7                |
| Lachnospiraceae Roseburia                             | 0.669         | 0.007 | 0.003 | 17                        | 11 | 19             | 5                  | 2                |
| Lachnospiraceae unknown Syntrophococcus               | 0.658         | 0.002 | 0.000 | 12                        | 3  | 39             | 6                  | 6                |
| Lachnospiraceae unknown Roseburia                     | 0.646         | 0.011 | 0.002 | 17                        | 16 | 11             | 7                  | 3                |
| Lachnospiraceae Clostridium.XIVb                      | 0.598         | 0.003 | 0.001 | 11                        | 3  | 48             | 8                  | 17               |
| Ruminococcaceae unknown Clostridium.IV                | 0.581         | 0.005 | 0.003 | 15                        | 6  | 26             | 9                  | 5                |
| Lachnospiraceae unknown Lactonifactor                 | 0.559         | 0.001 | 0.000 | 9                         | 2  | 53             | 10                 | 10               |
| Ruminococcaceae unknown Subdoligranulum               | 0.519         | 0.024 | 0.005 | 13                        | 6  | 24             | 11                 | 13               |
| Lachnospiraceae unknown Coprococcus                   | 0.429         | 0.005 | 0.002 | 12                        | 6  | 32             | 12                 | 12               |
| Lachnospiraceae unknown Anaerostipes                  | 0.414         | 0.012 | 0.002 | 15                        | 10 | 16             | 13                 | 14               |
| Ruminococcaceae Clostridium.IV                        | 0.393         | 0.005 | 0.001 | 13                        | 7  | 43             | 14                 | 24               |
| Ruminococcaceae unknown Faecalibacterium              | 0.391         | 0.002 | 0.001 | 13                        | 5  | 31             | 15                 | 11               |
| Lachnospiraceae unknown Ruminococcus2                 | 0.387         | 0.015 | 0.004 | 16                        | 15 | 10             | 16                 | 18               |
| Lachnospiraceae Ruminococcus2                         | 0.379         | 0.010 | 0.003 | 17                        | 12 | 13             | 17                 | 26               |
| Lachnospiraceae Fusicatenibacter                      | 0.378         | 0.005 | 0.003 | 14                        | 9  | 20             | 18                 | 21               |
| Lachnospiraceae Blautia                               | 0.376         | 0.048 | 0.014 | 19                        | 21 | 4              | 19                 | 8                |
| Streptococcaceae Streptococcus                        | 0.369         | 0.055 | 0.056 | 17                        | 31 | 8              | 20                 | 29               |
| Lachnospiraceae unknown Clostridium.XIVa              | 0.358         | 0.027 | 0.006 | 20                        | 25 | 3              | 21                 | 28               |
| Ruminococcaceae unknown Anaerofilum                   | 0.355         | 0.007 | 0.001 | 10                        | 6  | 56             | 22                 | 23               |
| Ruminococcaceae unknown Acetanaerobacterium           | 0.346         | 0.001 | 0.000 | 8                         | 1  | 67             | 23                 | 37               |
| Rikenellaceae Alistipes                               | 0.331         | 0.013 | 0.003 | 14                        | 13 | 14             | 24                 | 22               |
| Lachnospiraceae unknown Dorea                         | 0.331         | 0.010 | 0.001 | 15                        | 11 | 18             | 25                 | 27               |
| Porphyromonadaceae Parabacteroides                    | 0.324         | 0.014 | 0.036 | 19                        | 20 | 7              | 26                 | 25               |
| Lachnospiraceae Lachnospiracea incertae sedis         | 0.320         | 0.052 | 0.014 | 19                        | 21 | 5              | 27                 | 31               |
| Lachnospiraceae Eisenbergiella                        | 0.286         | 0.007 | 0.002 | 11                        | 11 | 47             | 28                 | 32               |
| Bacteroidaceae Bacteroides                            | 0.277         | 0.204 | 0.233 | 19                        | 29 | 1              | 29                 | 16               |
| Ruminococcaceae Subdoligranulum                       | 0.269         | 0.019 | 0.006 | 13                        | 6  | 27             | 30                 | 15               |
| Ruminococcaceae unknown Oscillibacter                 | 0.264         | 0.004 | 0.000 | 9                         | 3  | 35             | 31                 | 34               |
| Porphyromonadaceae Odoribacter                        | 0.255         | 0.003 | 0.000 | 3                         | 3  | 68             | 32                 | 35               |
| Ruminococcaceae Oscillibacter                         | 0.243         | 0.002 | 0.001 | 8                         | 5  | 29             | 33                 | 41               |
| Lachnospiraceae Coprococcus                           | 0.232         | 0.003 | 0.001 | 8                         | 2  | 59             | 34                 | 33               |
| Lachnospiraceae unknown Eisenbergiella                | 0.216         | 0.001 | 0.000 | 7                         | 1  | 81             | 35                 | 51               |

Table 1: Alcoholic Hepatitis Data Analysis [1]. Top 35 predictive taxa in the final random forest model using unfiltered data. AH: Alcoholic Hepatitis, HDC: Heavy Drinking Control. These taxa are consistently abundant, indicated by their abundance rank, which is defined by the number of samples a taxon is present in. There is also a strong agreement between the random forest (RF) variable importance rank (according to Mean Decrease Gini index) in unfiltered and filtered data.

| Features                                          | Decrease Gini | Mean    |       | Number of samples present |    | Abundance rank | Ranking            |                  |
|---------------------------------------------------|---------------|---------|-------|---------------------------|----|----------------|--------------------|------------------|
|                                                   |               | non IBD | CD    | non IBD                   | CD |                | RF Unfiltered rank | RF Filtered Rank |
| Lachnospiraceae LachnospiraceaeND3007group        | 2.330         | 0.002   | 0.000 | 37                        | 27 | 47             | 1                  | 1                |
| Bifidobacteriaceae Bifidobacterium                | 1.898         | 0.003   | 0.002 | 41                        | 49 | 27             | 2                  | 2                |
| Ruminococcaceae Ruminococcus1                     | 1.428         | 0.003   | 0.001 | 29                        | 16 | 66             | 3                  | 4                |
| Lachnospiraceae Eubacteriumeligenensgroup         | 1.329         | 0.002   | 0.002 | 34                        | 30 | 46             | 4                  | 6                |
| Ruminococcaceae RuminococcaceaeUCG002             | 1.245         | 0.010   | 0.004 | 37                        | 42 | 34             | 5                  | 5                |
| Lachnospiraceae uncultured                        | 1.104         | 0.013   | 0.006 | 42                        | 59 | 19             | 6                  | 9                |
| Ruminococcaceae Subdoligranulum                   | 1.086         | 0.022   | 0.014 | 42                        | 68 | 11             | 7                  | 12               |
| Christensenellaceae ChristensenellaceaeR7group    | 1.019         | 0.005   | 0.002 | 35                        | 30 | 45             | 8                  | 11               |
| Lachnospiraceae LachnospiraceaeUCG001             | 0.998         | 0.001   | 0.000 | 25                        | 11 | 78             | 9                  | 8                |
| Ruminococcaceae Butyricicoccus                    | 0.978         | 0.001   | 0.001 | 39                        | 52 | 23             | 10                 | 3                |
| Lachnospiraceae Fusicatenibacter                  | 0.937         | 0.009   | 0.005 | 43                        | 61 | 13             | 11                 | 16               |
| Lachnospiraceae Anaerostipes                      | 0.935         | 0.024   | 0.009 | 42                        | 68 | 12             | 12                 | 7                |
| Lachnospiraceae Eubacteriumventriosumgroup        | 0.795         | 0.001   | 0.000 | 28                        | 20 | 63             | 13                 | 24               |
| Lachnospiraceae Dorea                             | 0.777         | 0.004   | 0.003 | 41                        | 50 | 26             | 14                 | 13               |
| Enterobacteriaceae EscherichiaShigella            | 0.751         | 0.036   | 0.078 | 46                        | 84 | 1              | 15                 | 10               |
| Lachnospiraceae Lachnospira                       | 0.747         | 0.004   | 0.002 | 32                        | 34 | 44             | 16                 | 15               |
| Bacteroidaceae Bacteroides                        | 0.732         | 0.309   | 0.285 | 45                        | 85 | 2              | 17                 | 14               |
| Ruminococcaceae RuminococcaceaeNK4A214group       | 0.728         | 0.001   | 0.001 | 29                        | 21 | 60             | 18                 | 17               |
| Verrucomicrobiaceae Akkermansia                   | 0.716         | 0.013   | 0.010 | 29                        | 31 | 49             | 19                 | 31               |
| Ruminococcaceae RuminococcaceaeUCG014             | 0.688         | 0.002   | 0.001 | 17                        | 10 | 93             | 20                 | 19               |
| Ruminococcaceae RuminococcaceaeUCG005             | 0.654         | 0.003   | 0.002 | 28                        | 21 | 62             | 21                 | 41               |
| Fusobacteriaceae Fusobacterium                    | 0.650         | 0.003   | 0.021 | 34                        | 59 | 21             | 22                 | 23               |
| Lachnospiraceae Coprococcus1                      | 0.598         | 0.008   | 0.004 | 39                        | 46 | 30             | 23                 | 25               |
| Lachnospiraceae Blautia                           | 0.579         | 0.013   | 0.012 | 42                        | 71 | 10             | 24                 | 55               |
| Lachnospiraceae Lachnoclostridium                 | 0.569         | 0.020   | 0.030 | 41                        | 75 | 7              | 25                 | 30               |
| Erysipelotrichaceae Clostridiuminnocuumgroup      | 0.568         | 0.003   | 0.001 | 17                        | 39 | 52             | 26                 | 35               |
| Ruminococcaceae Faecalibacterium                  | 0.561         | 0.162   | 0.120 | 45                        | 79 | 3              | 27                 | 48               |
| Ruminococcaceae Ruminococcus2                     | 0.556         | 0.003   | 0.001 | 25                        | 23 | 64             | 28                 | 27               |
| Rikenellaceae Alistipes                           | 0.539         | 0.022   | 0.013 | 41                        | 61 | 17             | 29                 | 29               |
| Veillonellaceae Veillonella                       | 0.530         | 0.008   | 0.010 | 44                        | 70 | 9              | 30                 | 20               |
| Lachnospiraceae Eubacteriumxylanophilumgroup      | 0.528         | 0.001   | 0.001 | 23                        | 17 | 73             | 31                 | 22               |
| Lachnospiraceae LachnospiraceaeUCG008             | 0.523         | 0.015   | 0.013 | 42                        | 79 | 6              | 32                 | 36               |
| Erysipelotrichaceae Holdemania                    | 0.522         | 0.000   | 0.000 | 33                        | 36 | 39             | 33                 | 38               |
| Erysipelotrichaceae Erysipelatoclostridium        | 0.499         | 0.002   | 0.001 | 28                        | 43 | 38             | 34                 | 32               |
| Ruminococcaceae Eubacteriumcoprostanoligenesgroup | 0.496         | 0.001   | 0.001 | 27                        | 26 | 56             | 35                 | 69               |

Table 2: IBD Data Analysis [2]. Top 35 predictive taxa in the final random forest model using unfiltered data. Non IBD: patients without Inflammatory Bowel Disease and CD: patients with Crohn’s Disease. These taxa are consistently abundant, indicated by their abundance rank, which is defined by the number of samples a taxon is present in. There is also a strong agreement between the random forest (RF) variable importance rank (according to Mean Decrease Gini index) in unfiltered and filtered data.

## References

- [1] Smirnova, E., Puri, P., Muthiah, M.D., Daitya, K., Brown, R., Chalasani, N., Liangpunsakul, S., Shah, V.H., Gelow, K., Siddiqui, M.S., et al.: Fecal microbiome distinguishes alcohol consumption from alcoholic hepatitis but does not discriminate disease severity. *Hepatology* (2020)
- [2] Lloyd-Price, J., Arze, C., Ananthakrishnan, A.N., Schirmer, M., Avila-Pacheco, J., Poon, T.W., Andrews, E., Ajami, N.J., Bonham, K.S., Brislawn, C.J., et al.: Multi-omics of the gut microbial ecosystem in inflammatory bowel diseases. *Nature* **569**(7758), 655–662 (2019)
